# Supplementary material for: Effect of mitophagy in the formation of osteomorphs derived from osteoclasts
Source: PubMed Central journal article supplement — iScience. 2023 Apr 18;26(5):106682. doi: 10.1016/j.isci.2023.106682 (PMC10214740; doi:10.1016/j.isci.2023.106682), 2023-04-18
Supplement: mmc1.pdf [file mmc1.pdf]

## **Supplemental information**

### **Effect of mitophagy in the formation of osteomorphs derived from osteoclasts**

**Tingben Huang, Yuchen Wang, Zhou Yu, Xiaoyan Miao, Zhiwei Jiang, Ke Yu, Mengdie Fu, Kaichen Lai, Ying Wang, and Guoli Yang**

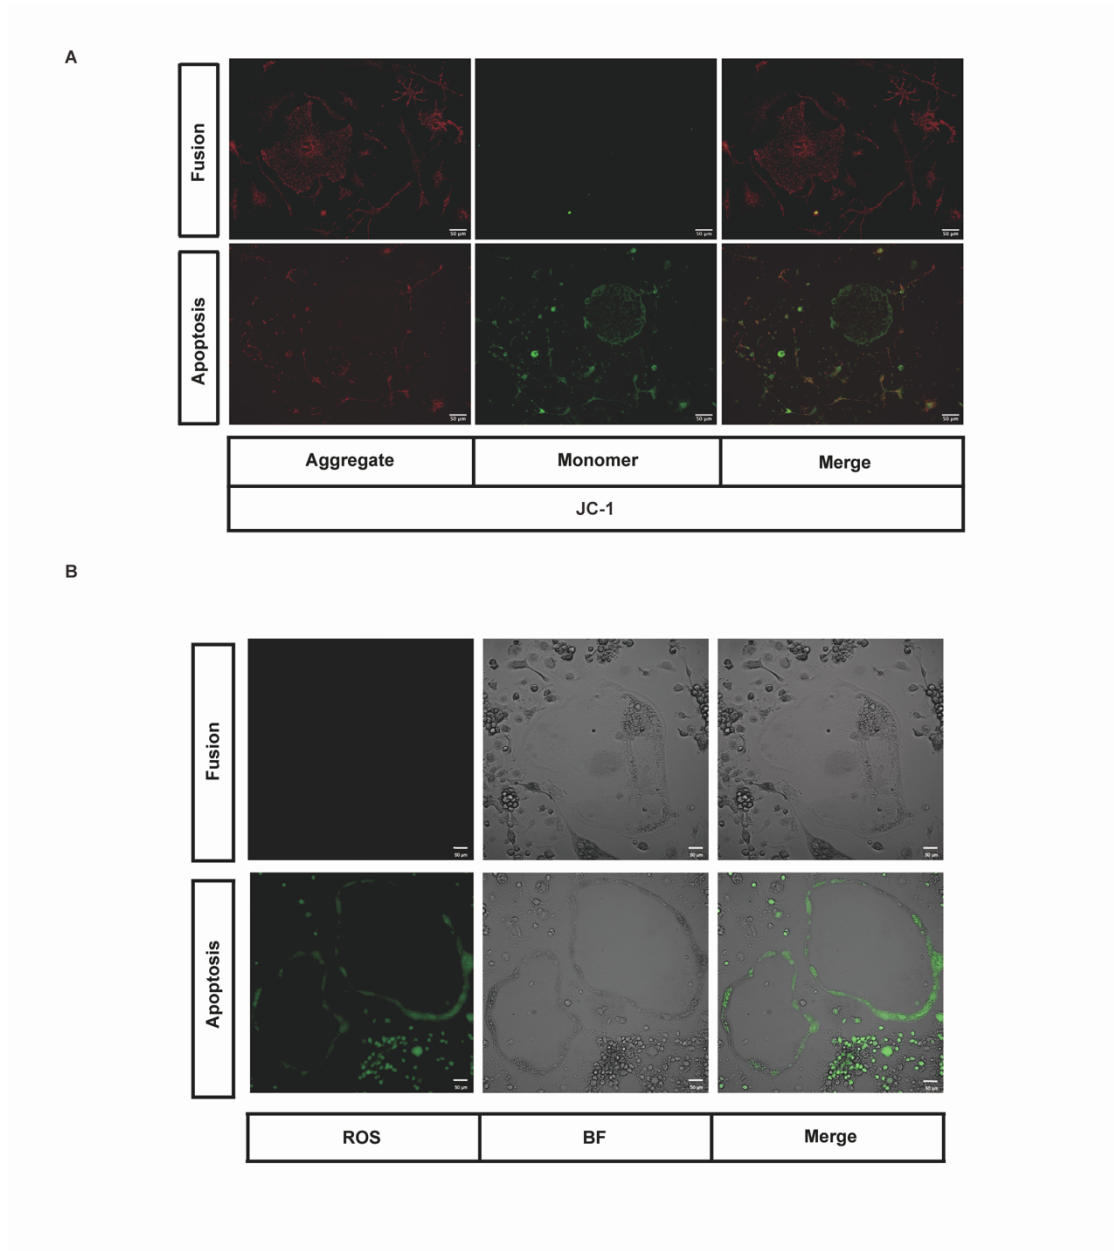

**Figure S1.** The alterations of mitochondrial membrane potential and ROS in apoptotic osteoclasts, Related to Figure 5.

(A) Representative JC-1 fluorescence images showing fused osteoclasts and apoptosis osteoclasts (J-aggregate, red; J-monomer, green) ( $n = 5$ ). The mitochondrial membrane potential of apoptotic cells disappeared

(B) Representative ROS fluorescence images showing fused osteoclasts and apoptosis osteoclasts (ROS, green) ( $n = 5$ ). ROS accumulated in apoptotic cells.

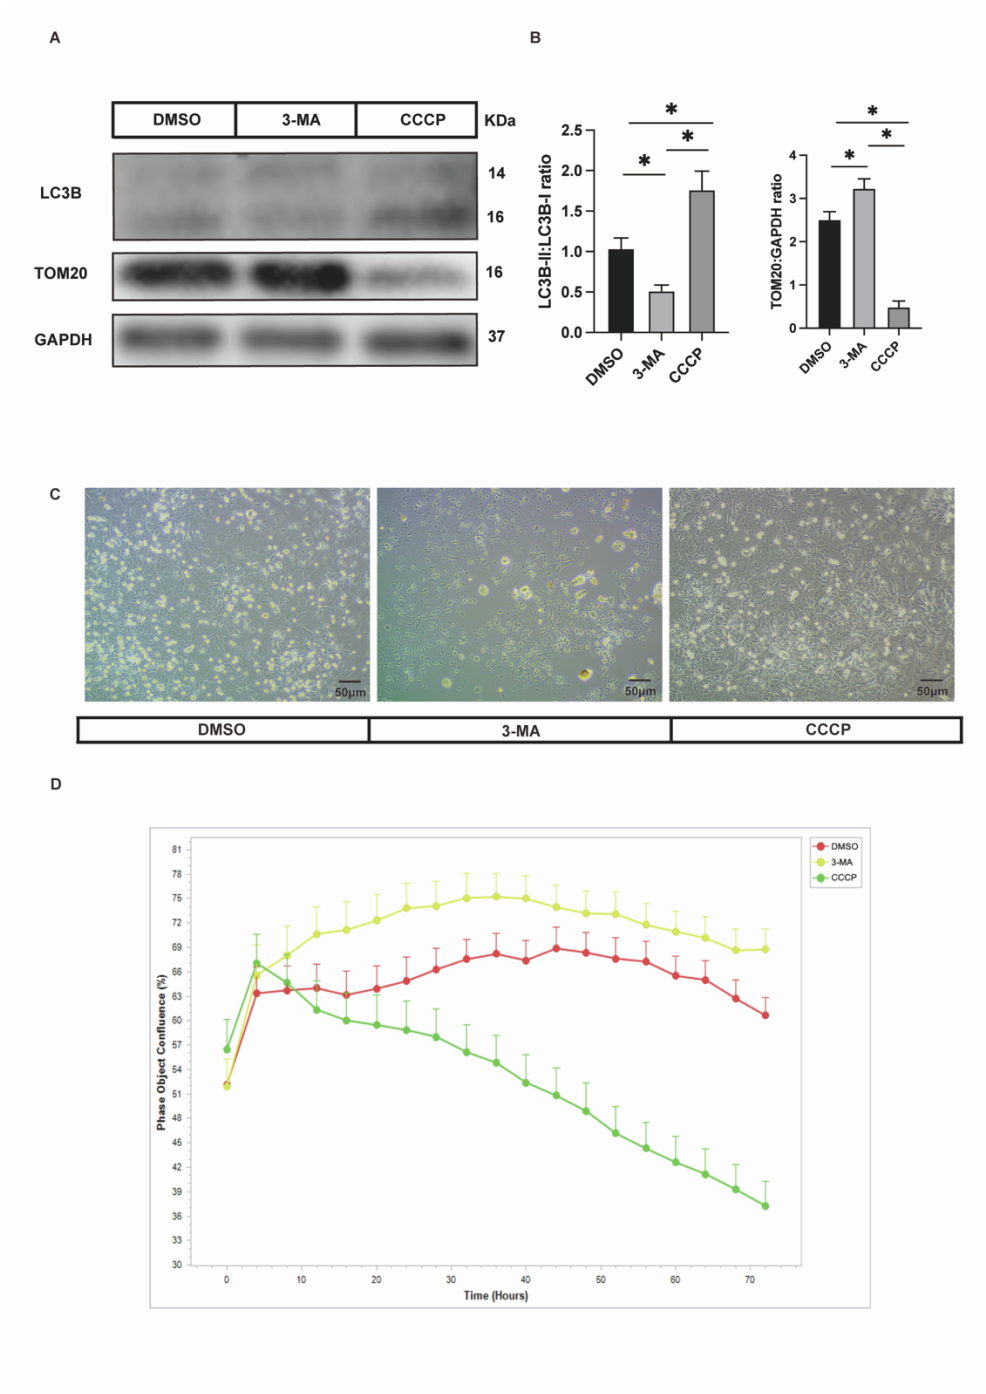

**Figure S2.** Inhibiting mitophagy induces osteoclast apoptosis, Related to Figure 6.

(A) Western blot analysis of the protein levels of LC3B, TOM20 and GAPDH in different osteoclast groups (n = 3). The osteoclasts were treated with DMSO, 3-MA and CCCP respectively after fused.

(B) Quantification of LC3B and TOM20 by immunoblotting.

(C) Representative images of osteoclasts after treated with drugs 3 days (n = 3).

(D) The cell confluence in different group (n = 5).

\*p < 0.05 by one-way ANOVA (B).

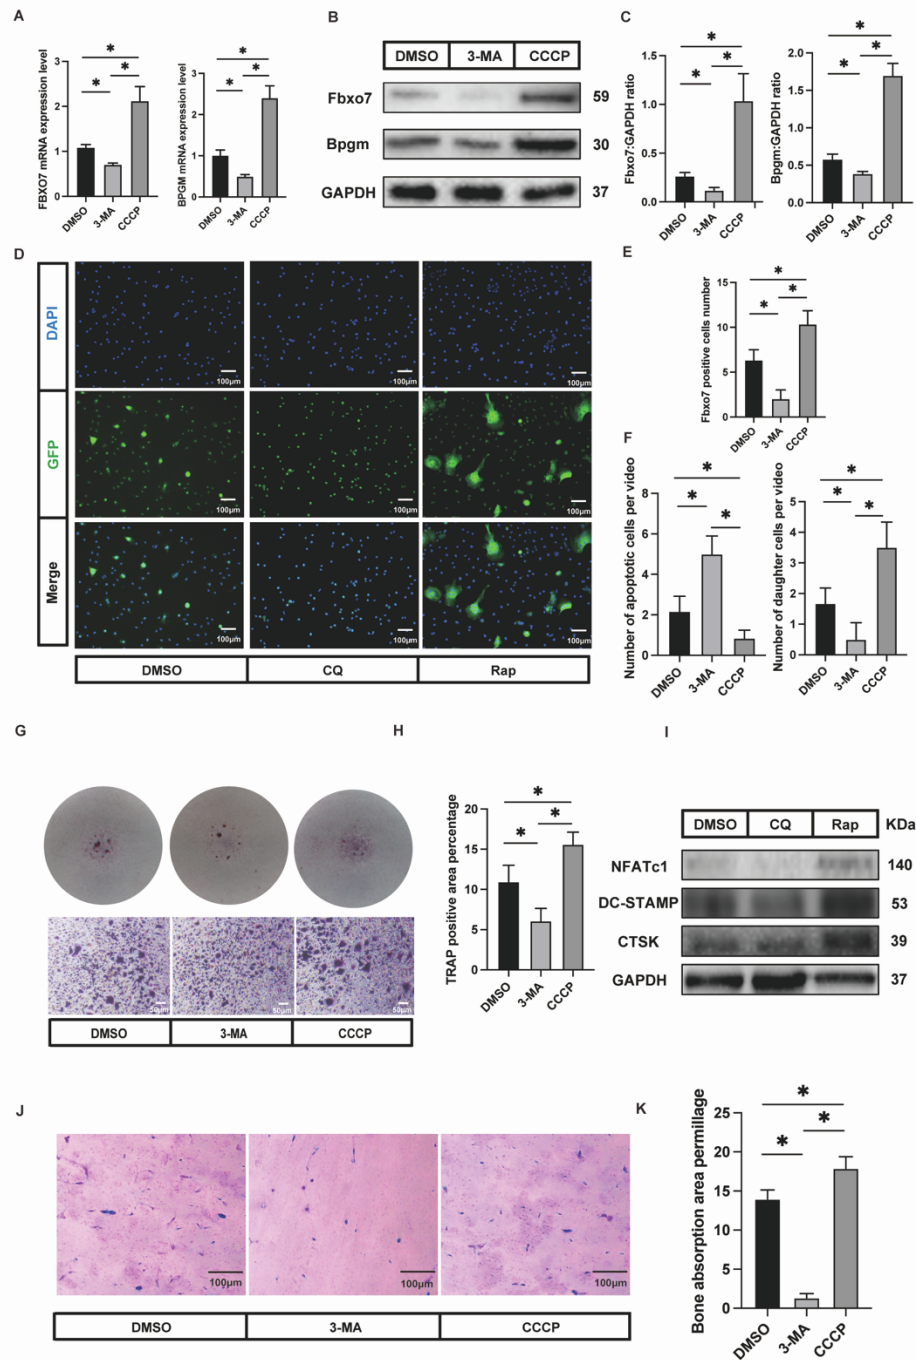

**Figure S3.** Enhancing mitophagy promotes osteoclast-osteomorph recycling, Related to Figure 7.

(A) The relative mRNA levels of Fbxo7 and Bpgm genes in DMSO, 3-MA and CCCP group (n = 3).

(B) Western blot analysis of the protein levels of Fbxo7, Bpgm and GAPDH in different osteoclast groups (n = 3).

(C) Quantification of Fbxo7 and Bpgm by immunoblotting.

(D) Representative images showing immunofluorescence staining (Fbxo7, green; DAPI, blue) in DMSO, 3-MA and CCCP group (n = 5).

(E) Number of Fbxo7 positive cells (n = 5).

- (F) Number of daughter cells and apoptotic cells in different groups (n = 6).
  - (G) Representative images showing TRAP staining in DMSO, 3-MA and CCCP group (n = 3). The cells were treated with RANKL again for 12 h after large osteoclasts disappearing.
  - (H) Quantification of TRAP positive area by ImageJ.
  - (I) Western blot analysis of the protein levels of NFATc1, DC-STAMP, CTSK, and GAPDH in different osteoclast groups.
  - (J) Representative images showing bone resorption pits in DMSO, 3-MA and CCCP group (n = 3).
  - (K) Quantification of bone resorption pits area.
- \*p < 0.05 by one-way ANOVA (A, C, E, F, H, and K).
